# Supplementary material for: Dansyl-anthracene dyads for ratiometric fluorescence recognition of Cu2+
Source: Royal Society of Chemistry journal article supplement (doi:10.1039/c0dt01016b), 2011-01-01
Supplement: c0dt01016b.pdf [file c0dt01016b.pdf]

## Dansyl-anthracene dyads for ratiometric fluorescence recognition of $\text{Cu}^{2+}$ .

Kuljit Kaur and Subodh Kumar\*

Department of Chemistry, Guru Nanak Dev University,  
Amritsar-143005, India.

subodh\_gndu@yahoo.co.in

### Electronic Supplementary Information

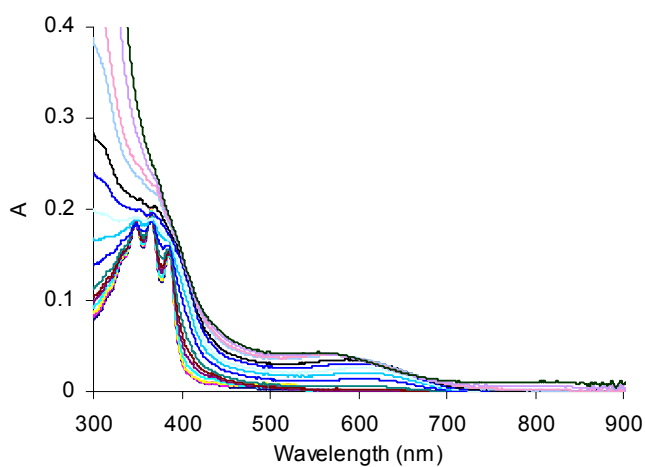

**Fig. S1:** Effect of gradual addition of  $\text{Cu}^{2+}$  ions on the UV/Vis absorption spectrum of dyad 1

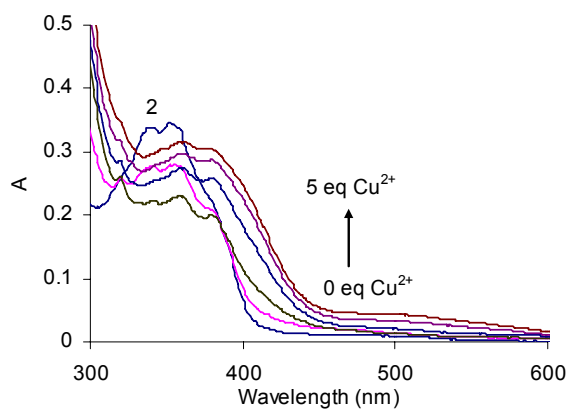

**Fig. S2:** Effect of gradual addition of  $\text{Cu}^{2+}$  ions on the UV/Vis absorption spectrum of dyad 2

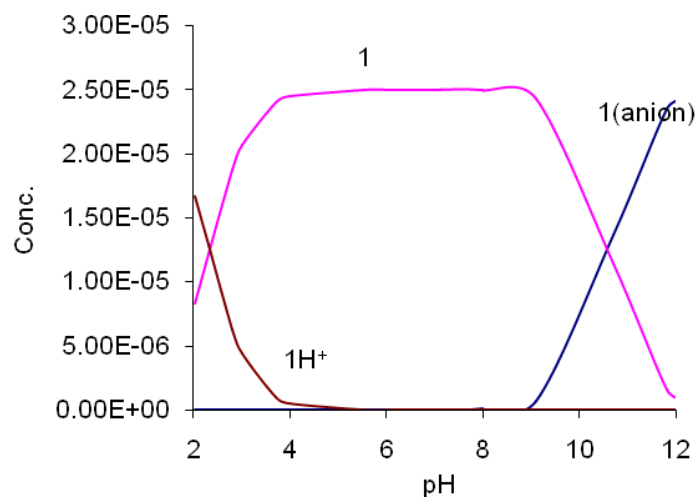

**Fig S3.** Species distribution in dyad **1** solution as a function of pH

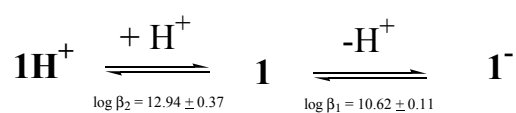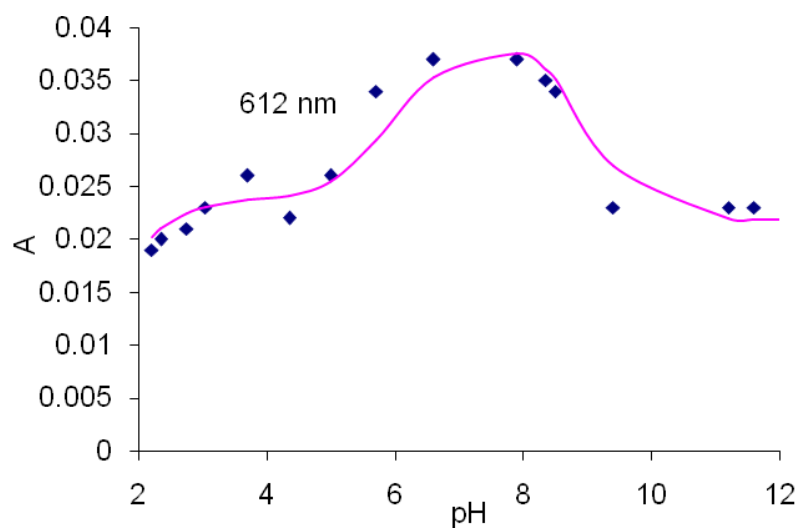

**Fig. S4.** Plot of absorbance of probe- $\text{Cu}^{2+}$  (1:1) complex (25  $\mu\text{M}$ ,  $\text{CH}_3\text{CN} : \text{H}_2\text{O}$  (7 : 3)), vs pH at 612 nm. The points refer to experimental values and line to curve fit.

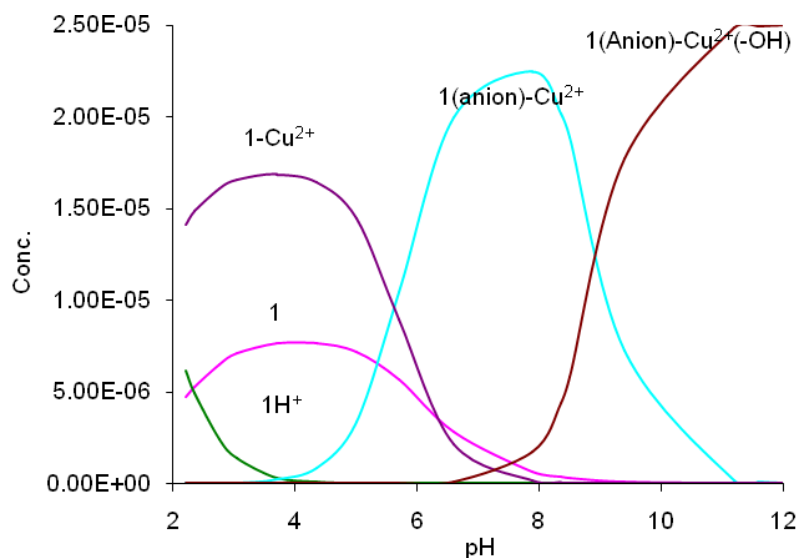

**Fig S5.** Species distribution in dyad 1-Cu<sup>2+</sup> (1:1) solution as a function of pH

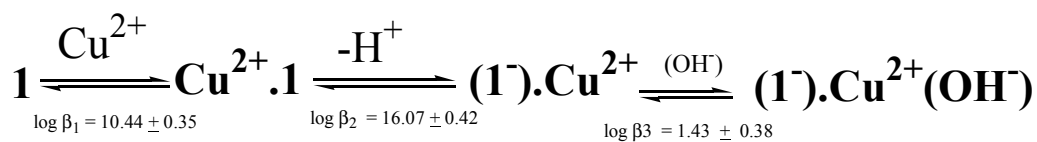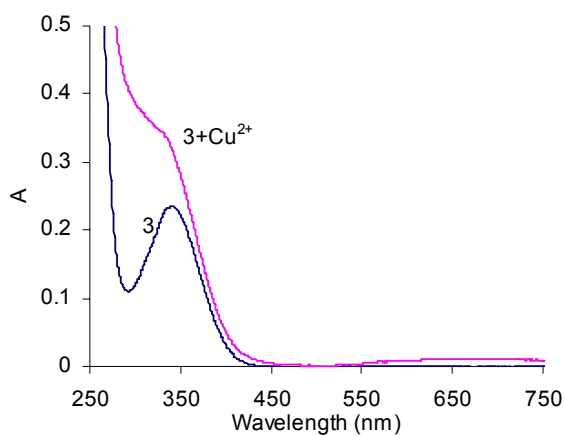

**Fig. S6:** Effect of addition of Cu<sup>2+</sup> on the UV/Vis absorption spectrum of probe 3 (25 μm, CH<sub>3</sub>CN : H<sub>2</sub>O (7:3), 0.1 mM HEPES, pH 7.0 ± 0.1).

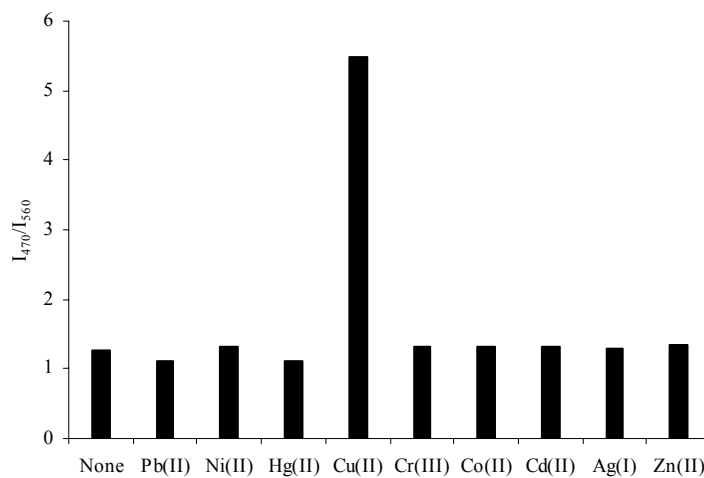

**Fig. S7:** Fluorescence ratiometric response ( $I_{470}/I_{560}$ ) of dyad **1** (1  $\mu\text{M}$ ) upon addition of different metal ions (100  $\mu\text{M}$ ) in  $\text{CH}_3\text{CN-H}_2\text{O}$  (7:3) HEPES buffer, pH 7.0. ( $\lambda_{\text{ex}}$  : 335 nm).

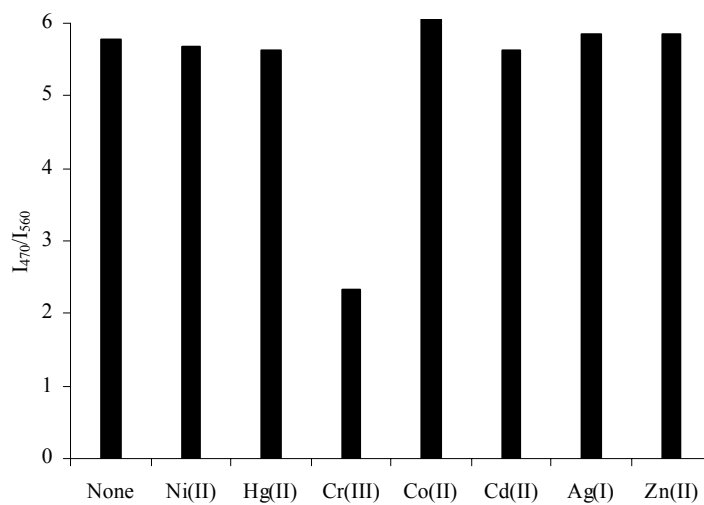

**Fig. S8:** (a) Fluorescence ratiometric response ( $I_{470}/I_{560}$ ) of dyad **1** (1  $\mu\text{M}$ ) containing 5  $\mu\text{M}$   $\text{Cu}^{2+}$  and background metal ions (50  $\mu\text{M}$ ) in  $\text{CH}_3\text{CN-H}_2\text{O}$  (7:3) HEPES 0.01 M, pH 7.0  $\pm$  0.1. ( $\lambda_{\text{ex}}$  : 335 nm).

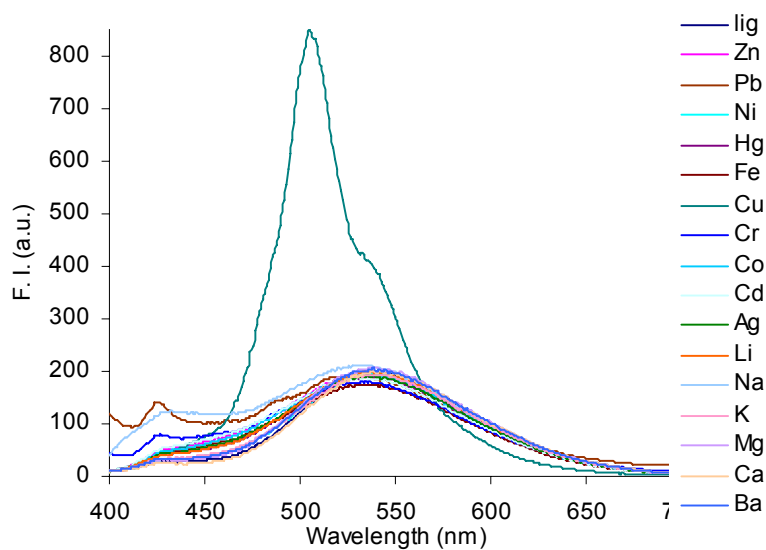

**Fig. S9:** Effect of different metal ions on the fluorescence spectrum of dyad **2** (1  $\mu$ M, CH<sub>3</sub>CN : H<sub>2</sub>O (7:3); 0.1 mM HEPES, pH 7.0  $\pm$  0.1.  $\lambda_{\text{ex}}$  = 375 nm.

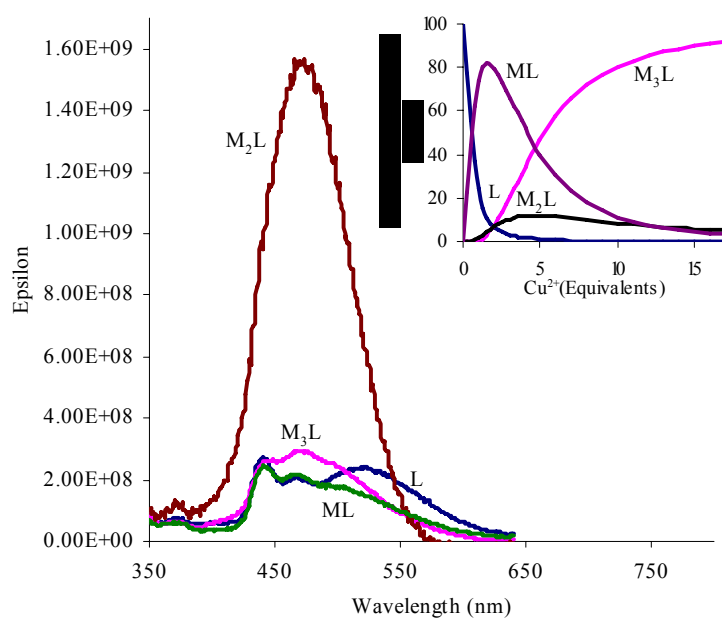

**Fig. S10:** Species distribution curve from fluorescence titration of dyad **1** with Cu<sup>2+</sup>.

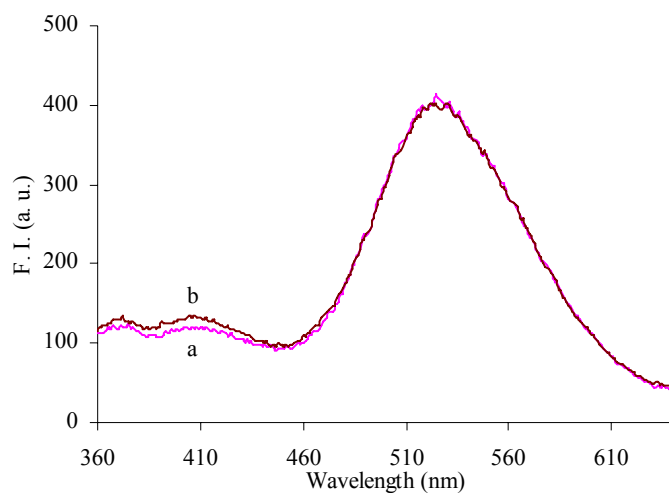

**Fig. S11** : effect of  $\text{Cu}^{2+}$  ( 1000  $\mu\text{M}$ ) on the fluorescence spectrum of dyad **3** ( 0.5  $\mu\text{M}$ ,  $\text{CH}_3\text{CN} : \text{H}_2\text{O}$  (7:3); 0.1 mM HEPES,  $\text{pH } 7.0 \pm 0.1$ ). (a) dyad **3** (b) dyad **3** +  $\text{Cu}^{2+}$  ions ( $\lambda_{\text{ex}} = 335$  nm).

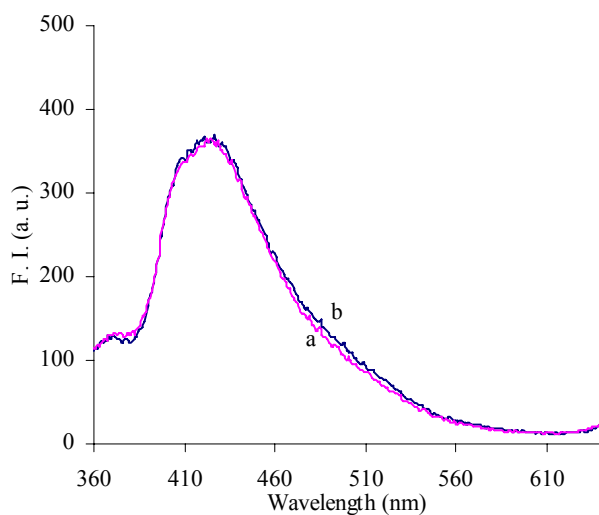

**Fig. S12**: Fluorescence spectra of (a) Dyad **5** ( $5 \times 10^{-7}$  M) (b) Dyad **5** +  $\text{Cu}^{2+}$  ions in  $\text{CH}_3\text{CN} : \text{H}_2\text{O}$  (7:3) [0.1 mM HEPES,  $\text{pH } 7.0 \pm 0.1$ ].  $\lambda_{\text{ex}} = 335$  nm.

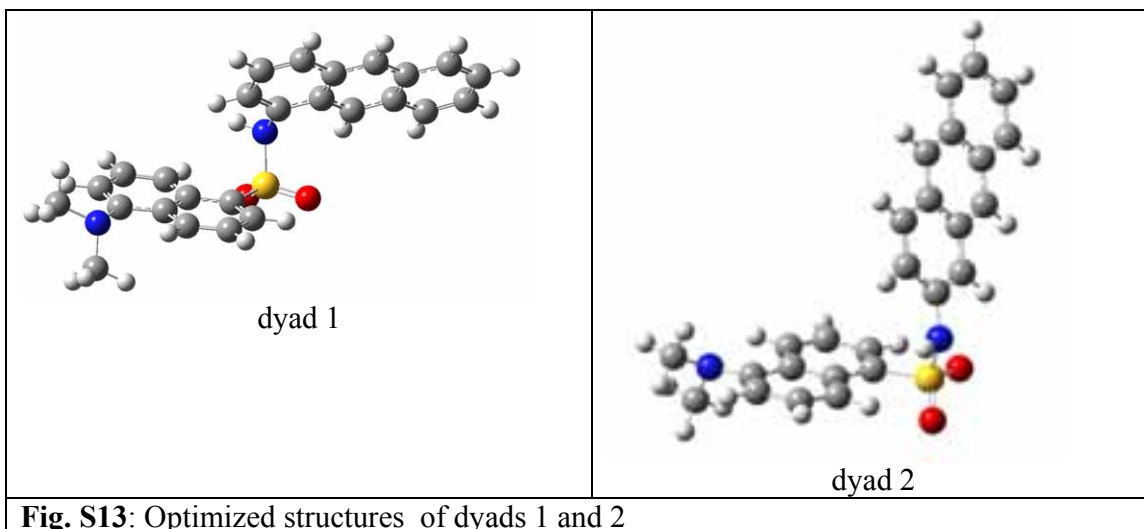

**Fig. S13:** Optimized structures of dyads 1 and 2

### Spectral data

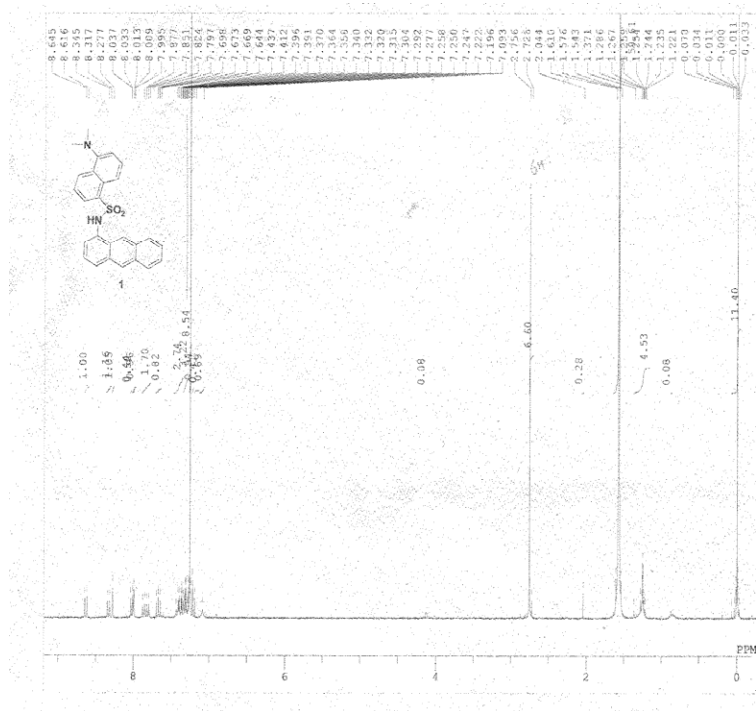

Fig. S14 :  $^1\text{H}$  NMR spectrum of dyad 1 ( $\text{CDCl}_3$ ).

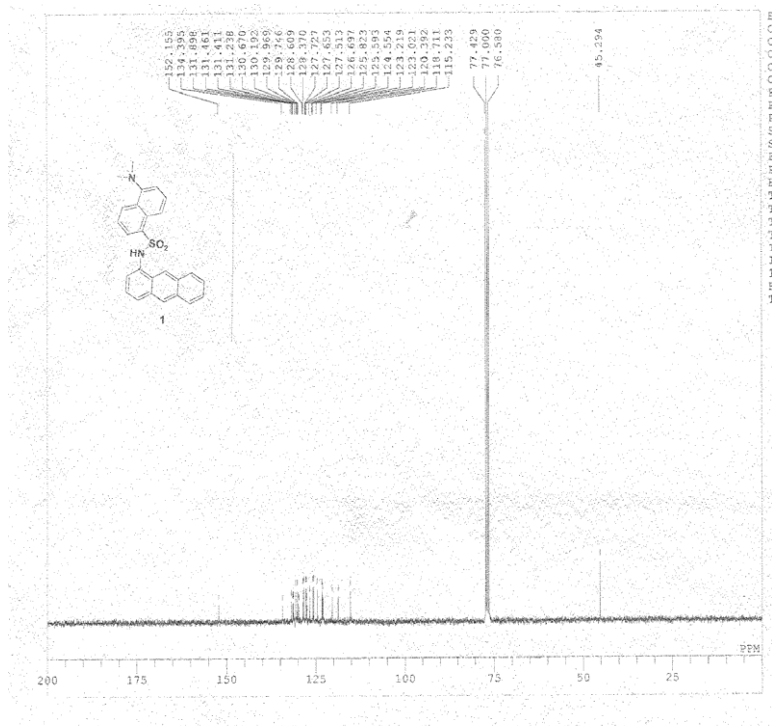

Fig. S15:  $^{13}\text{C}$  NMR spectrum of dyad 1 ( $\text{CDCl}_3$ ).



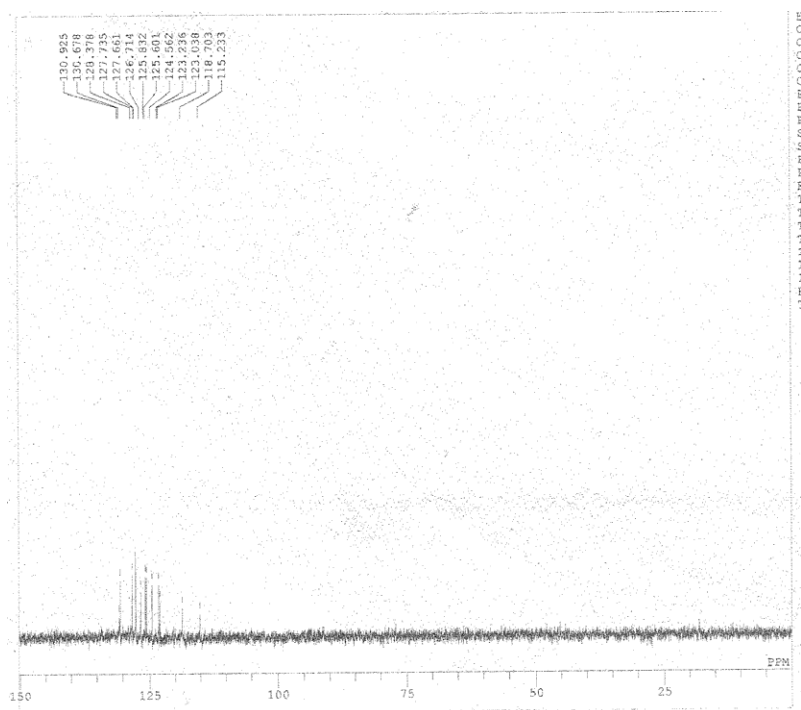

**Fig. S16:** DEPT-135 spectrum of dyad **1** ( $\text{CDCl}_3$ ).

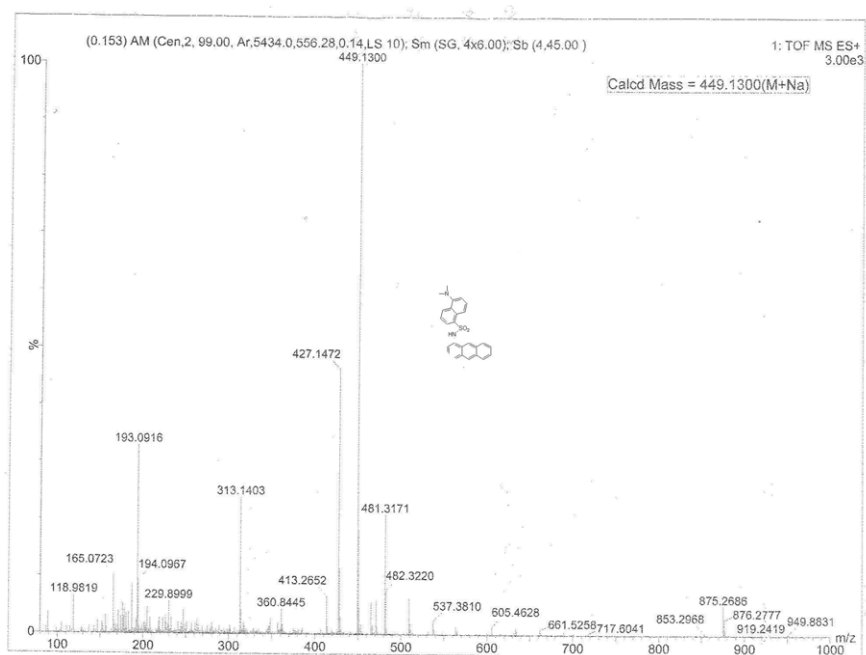

**Fig. S17:** High Resolution Mass spectrum of dyad **1**.

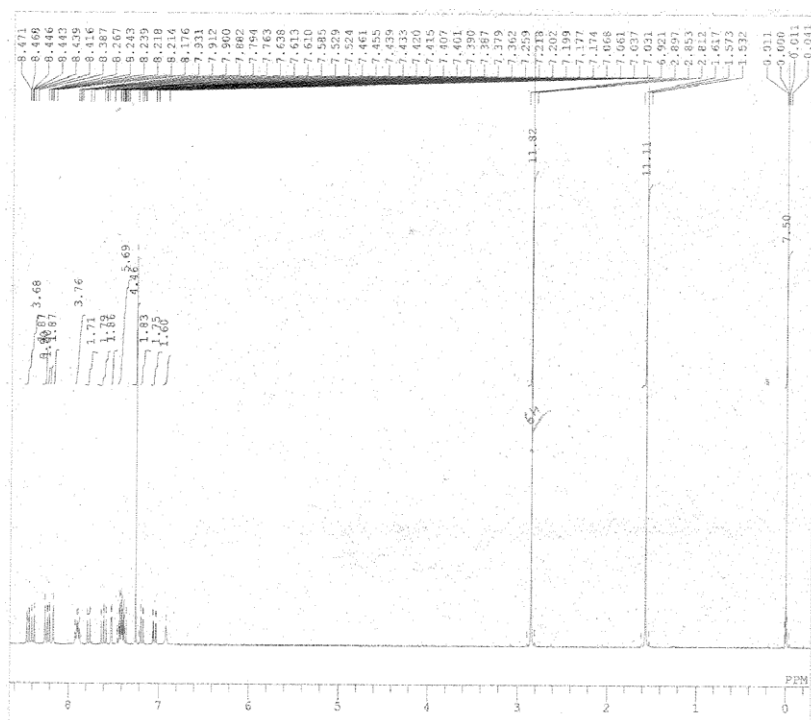

Fig. S18:  $^1\text{H}$  NMR spectrum of dyad **2** ( $\text{CDCl}_3$ ).

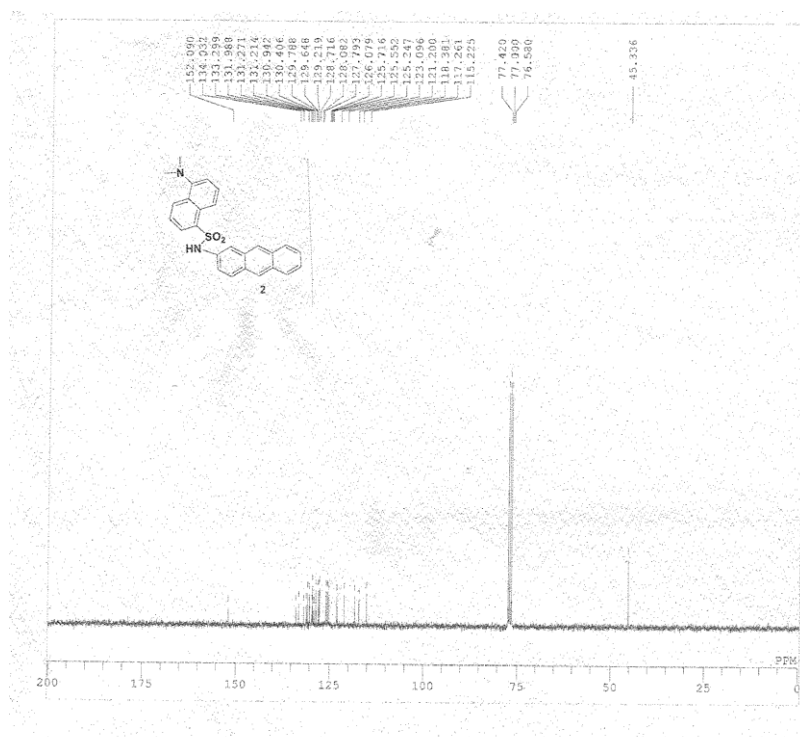

Fig. S19:  $^{13}\text{C}$  NMR spectrum of dyad **2** ( $\text{CDCl}_3$ ).

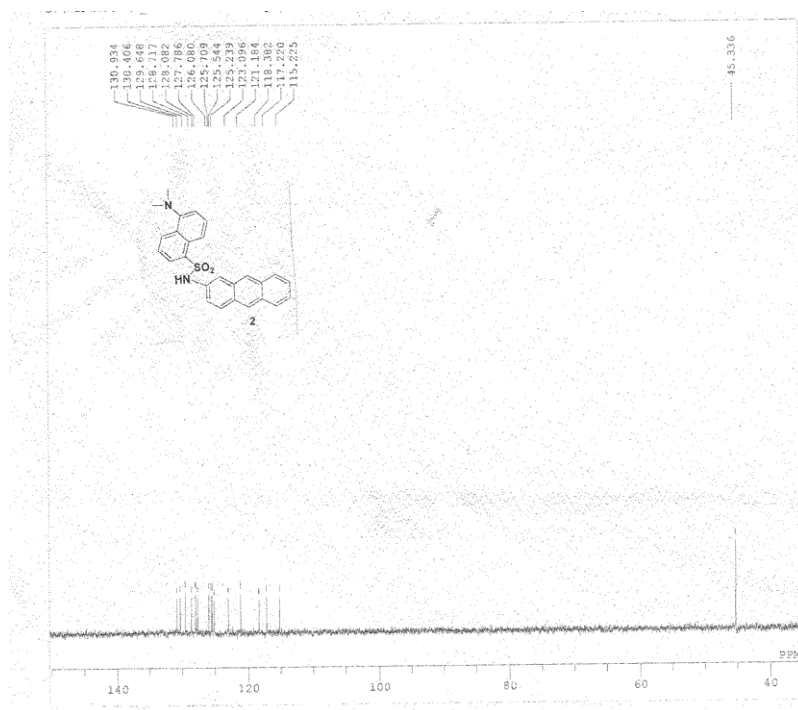

Fig. S20: DEPT-135 spectrum of dyad **2** ( $\text{CDCl}_3$ ).

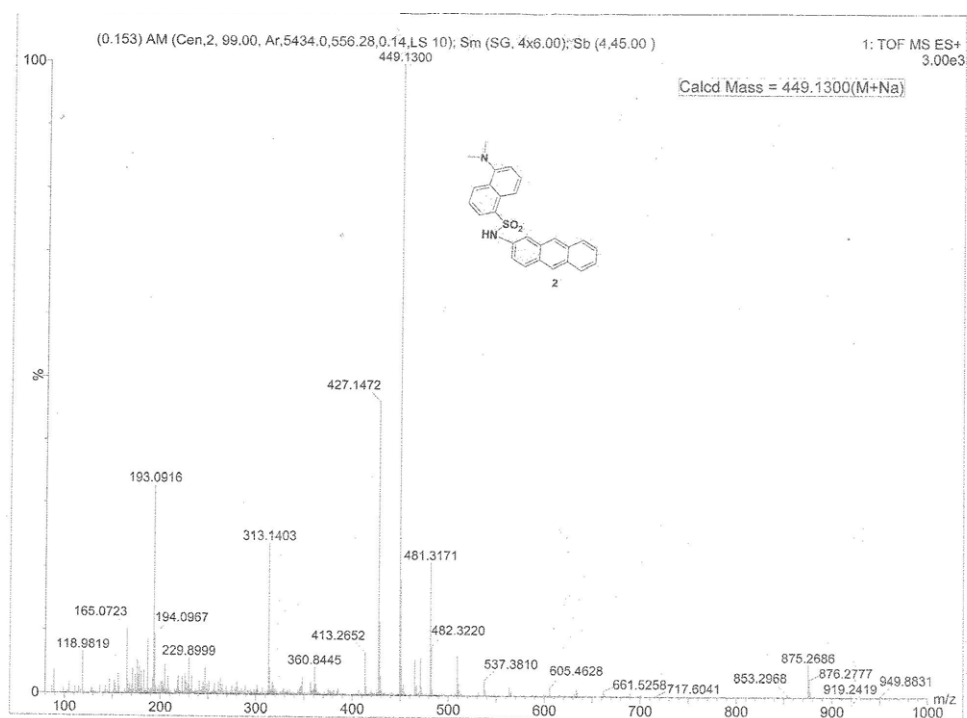

Fig. S21: High Resolution Mass spectrum of dyad **2**.

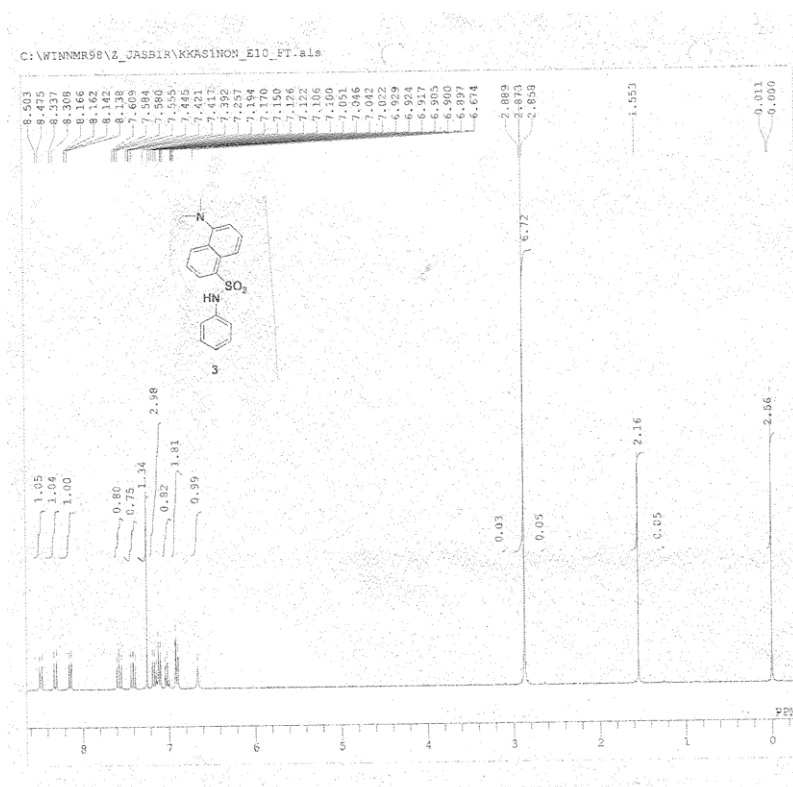

Fig. S22:  $^1\text{H}$  NMR spectrum of probe 3 ( $\text{CDCl}_3$ ).

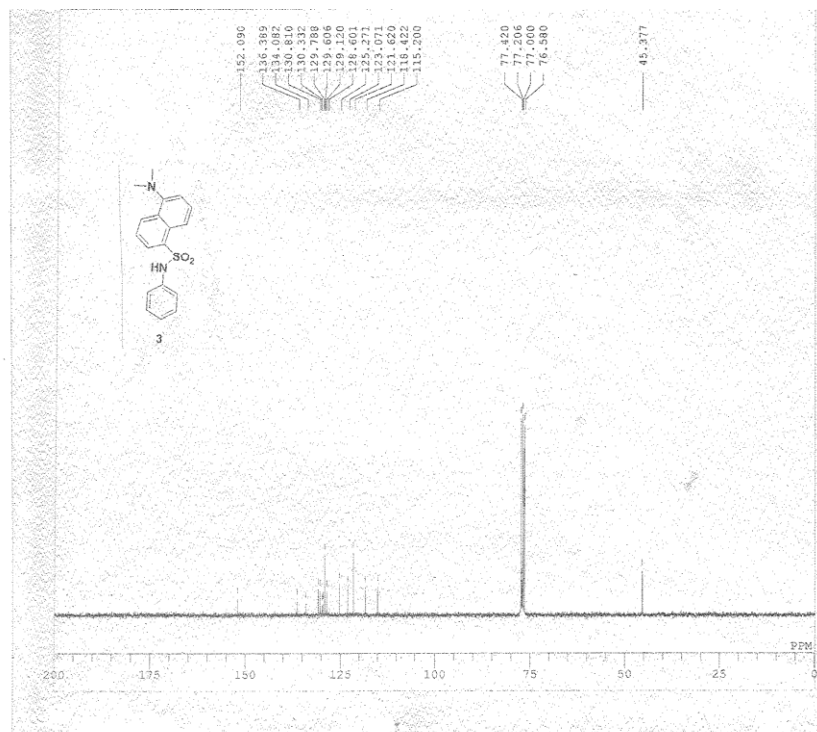

Fig. S23:  $^{13}\text{C}$  NMR spectrum of probe 3 ( $\text{CDCl}_3$ ).

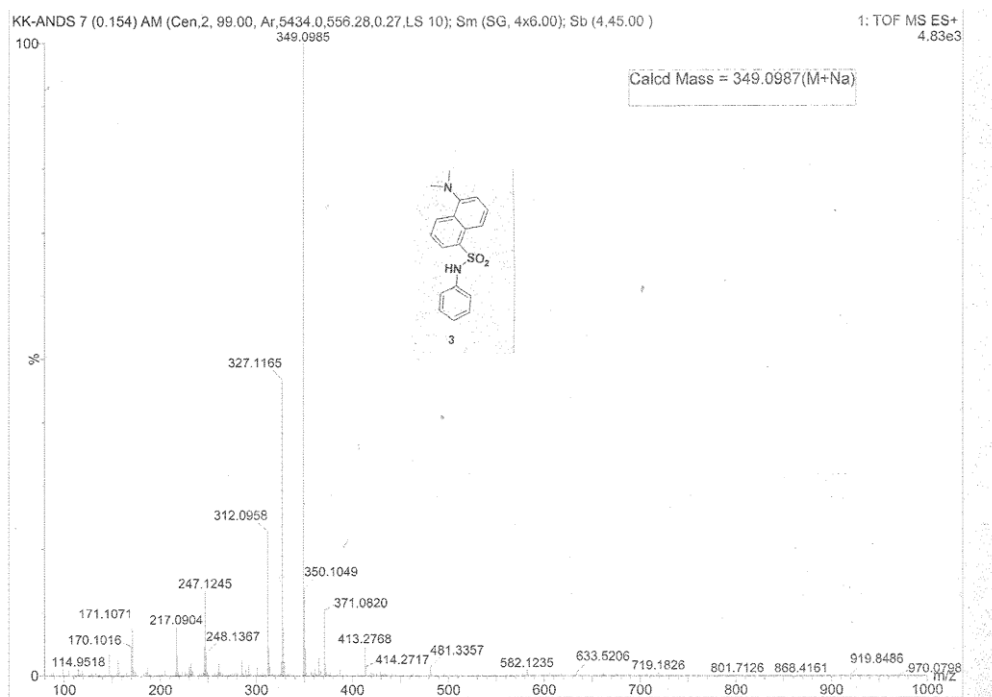

Fig. S24: High Resolution Mass spectrum of probe 3.

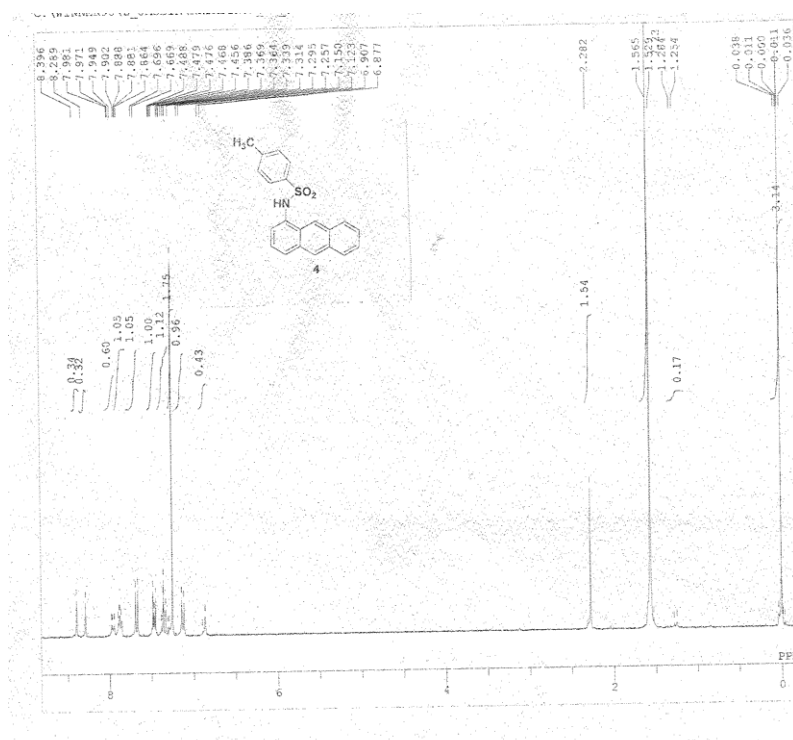

Fig. S25:  $^1\text{H}$  NMR spectrum of probe 4 ( $\text{CDCl}_3$ ).

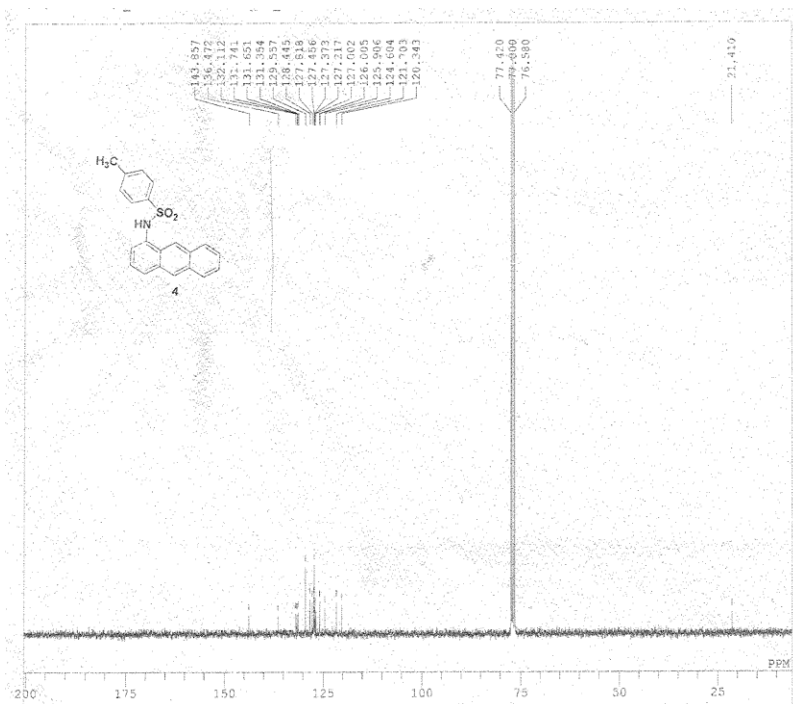

Fig. S26:  $^{13}\text{C}$  NMR spectrum of probe 4 ( $\text{CDCl}_3$ ).

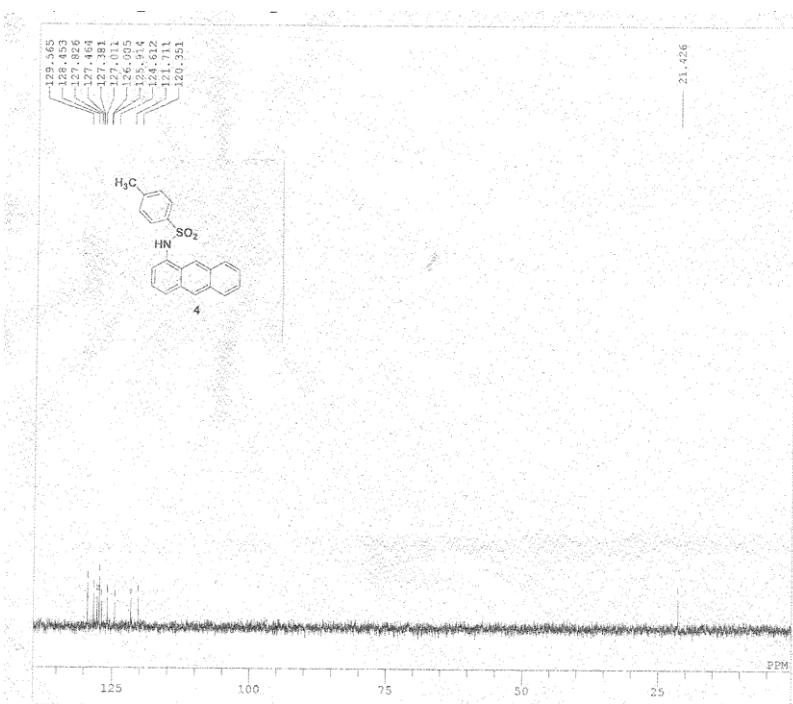

Fig. S27: DEPT-135 NMR spectrum of probe 4 ( $\text{CDCl}_3$ ).

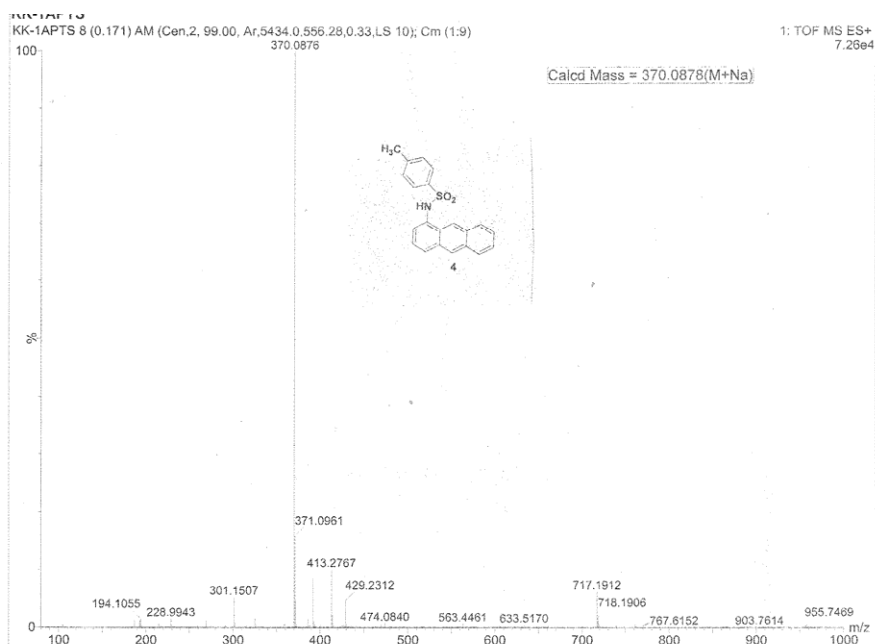

Fig. S28: High Resolution Mass spectrum of probe 4.

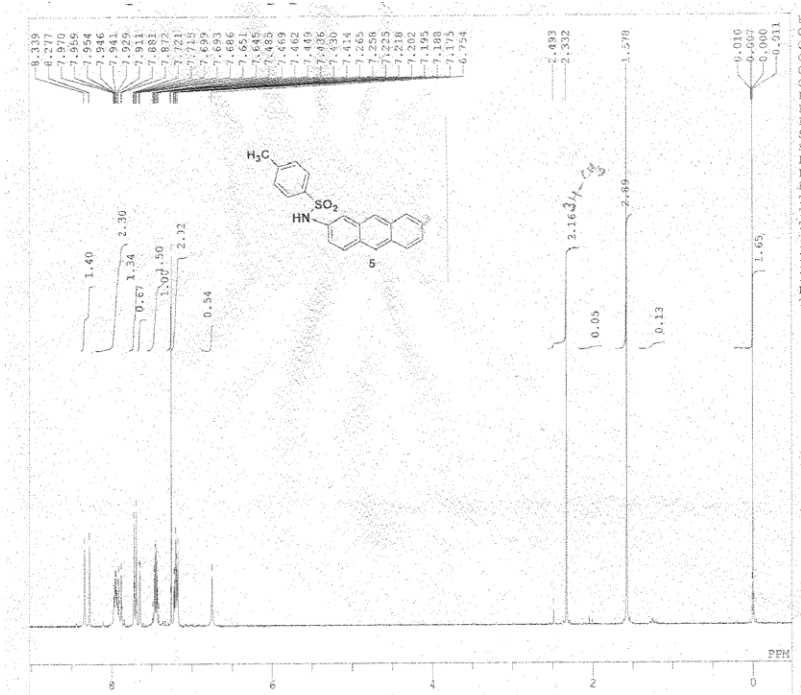

Fig. S29:  $^1\text{H}$  NMR spectrum of probe 5 ( $\text{CDCl}_3$ ).

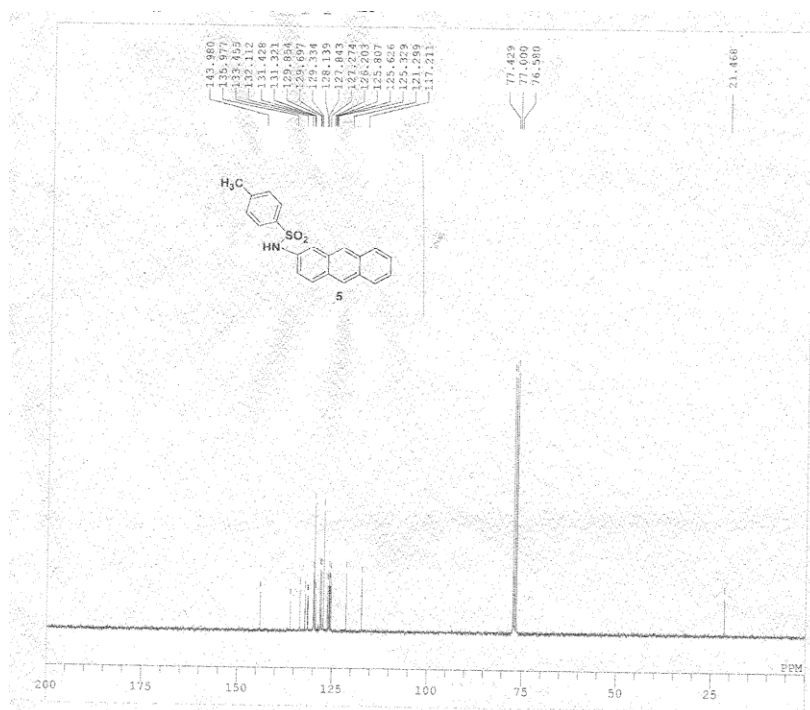

Fig. S30:  $^{13}\text{C}$  NMR spectrum of probe 5 ( $\text{CDCl}_3$ ).

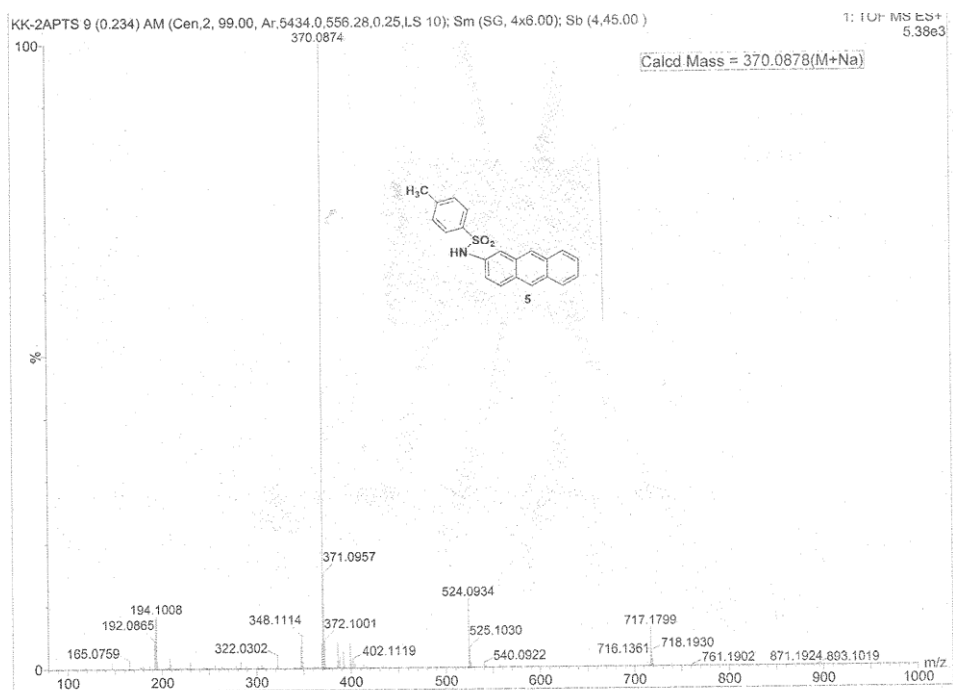

Fig. S31: High Resolution Mass spectrum of probe 5.
